# Supplementary material for: Activation of Autophagic Flux Maintains Mitochondrial Homeostasis during Cardiac Ischemia/Reperfusion Injury
Source: MDPI journal article supplement (doi:10.3390/cells11132111), 2022-07-04
Supplement: s1 [file s1]

## Supplemental Figures:

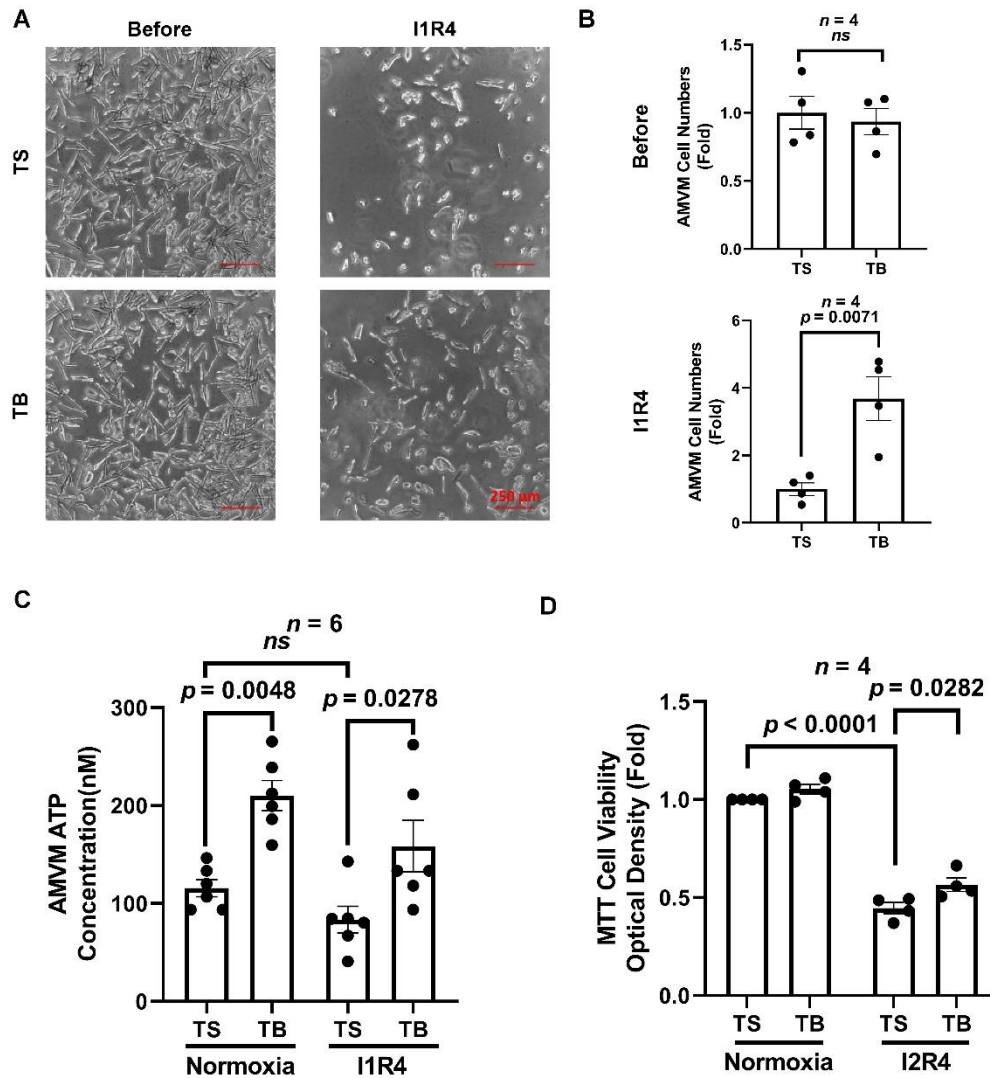

**Figure S1.** TB reduces cell death in both adult mouse cardiomyocytes and neonatal rat ventricular cardiomyocytes. A. Representative microscopic picture of adult mouse cardiomyocytes. Bar = 250  $\mu$  m. B. Quantification of cell number before and after I/R. Cell numbers after I/R,  $n = 4$ , TS vs. TB,  $p = 0.0071$ . C. Cellular ATP was measured in AMVMs.  $n = 6$ . Normoxia, TS vs. TB,  $p = 0.0048$ . I1R4, TS vs. TB,  $p = 0.0278$ . D. MTT cell viability assay of neonatal rat ventricular cardiomyocytes. MTT cell viability after I/R,  $n = 4$ , TS vs. TB,  $p = 0.028$ . TS, Tat-Scrambled; TB, Tat-Beclin 1; I1R4, Ischemia 1 hour and reperfusion 4 hours; I2R4, Ischemia 2 hours and reperfusion 4 hours; NS (not significant).

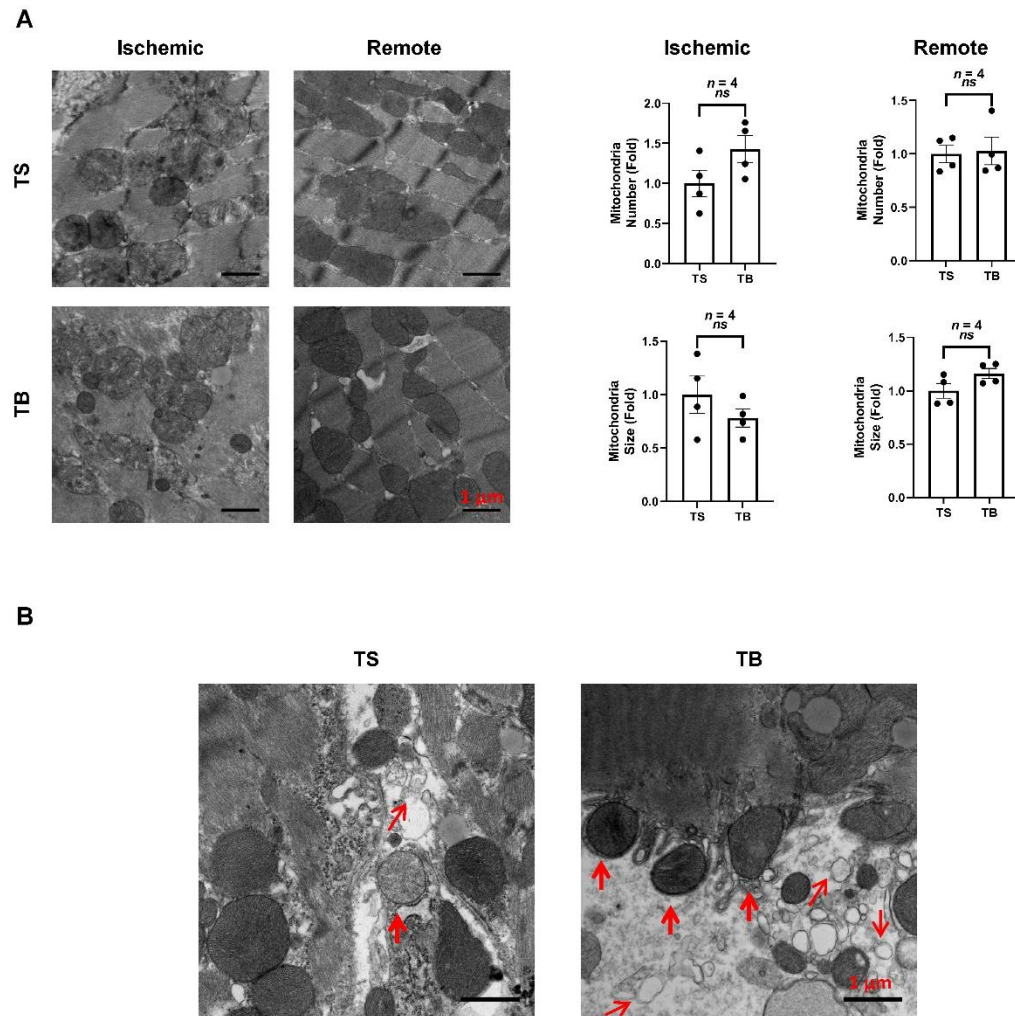

**Figure S2.** TB treatment does not affect mitochondrial morphology in mouse ischemic and remote zones, but increases autophagosome in the border zone. A. Representative electron microscopic picture of mouse myocardium in the ischemic and remote zones. Bar = 1 $\mu$ m. n = 4, TS vs. TB, NS (not significant). B. Representative electron microscopic picture of mouse myocardium in the border zone (between sarcomeres). Bar = 1 $\mu$ m. Arrows, autophagosome with double membrane enclosing. Some of the mitochondria have been enclosed, suggesting increased mitophagy. TS, Tat-Scrambled; TB, Tat-Becn1 1.

A

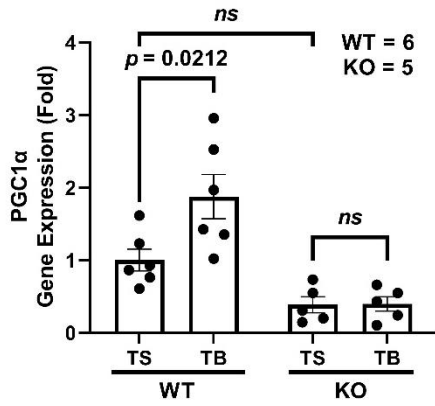

B

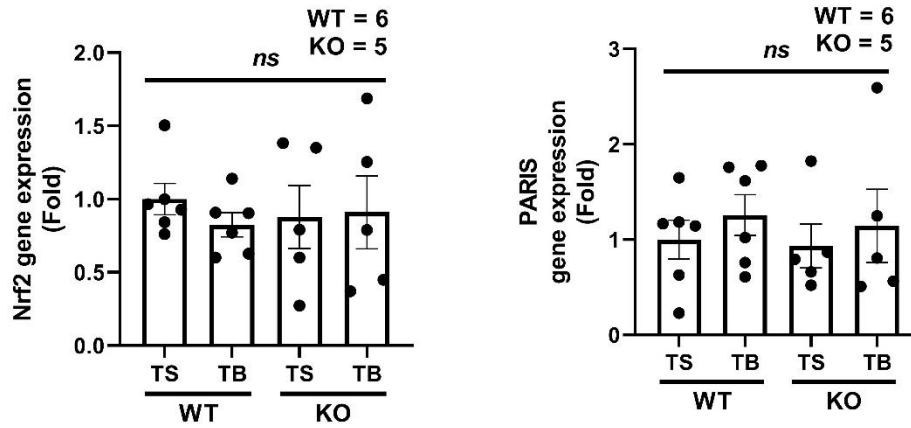

**Figure S3.** TB treatment increases PGC1 $\alpha$  gene expression in AMVMs, but does not increase the expression of two upstream regulators, NRF2 and PARIS. A, PGC1 $\alpha$  gene expression in AMVMs.  $n = 5-6$ . TS vs. TB, WT,  $p = 0.0212$ . KO,  $p = \text{NS}$  (not significant). B, NRF2 and PARIS gene expression in AMVMs.  $n = 5-6$ .  $p = \text{NS}$ . TS, Tat-Scrambled; TB, Tat-Beclin 1; NS (not significant).

A

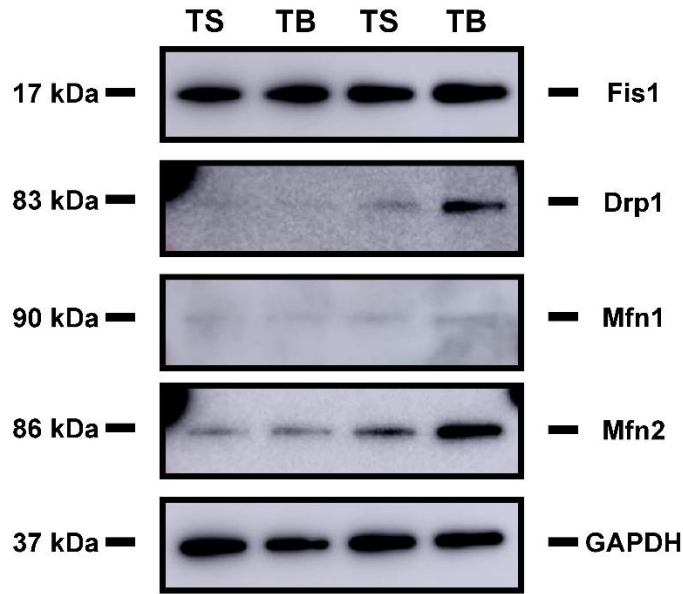

B

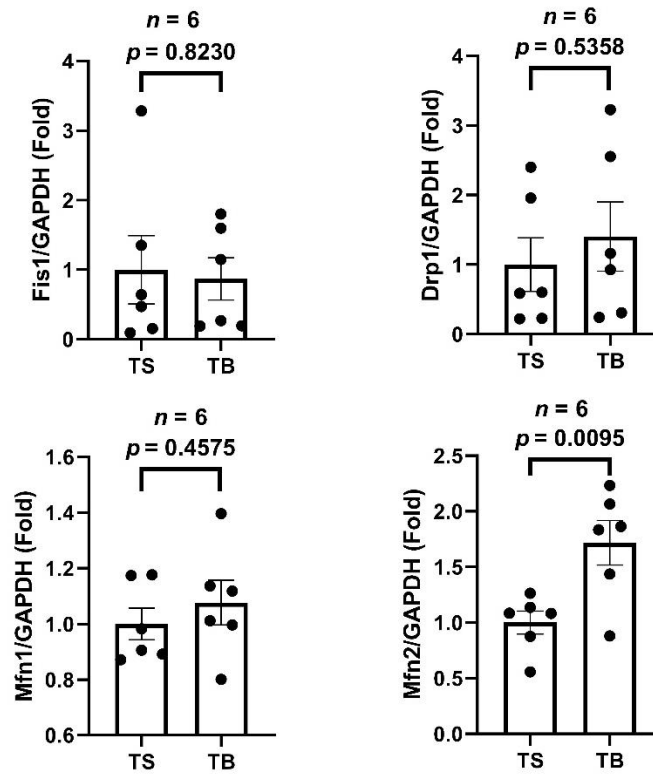

**Figure S4.** Mitochondrial fission and fusion protein expression in AMVMs. A-B, Representative western blot, and quantification of Fis1, Drp1, Mfn1, and Mfn2 levels in AMVMs.  $n = 6$ . TS vs. TB, Fis1,  $p = 0.8230$  (NS). Drp1,  $p = 0.5358$  (NS). Mfn1,  $p = 0.4575$  (NS). Mfn2,  $p = 0.0095$ . TS, Tat-Scrambled; TB, Tat-Beclin 1; NS (not significant).

## Expanded Materials & Methods

### Animal studies

C57BL/6J mice were obtained from the Jackson lab.

The ATG7<sup>F/F</sup> mouse was provided by Dr. Massaki Komatsu<sup>1</sup>, and the  $\alpha$ MHC-merCremer mouse was obtained from Jackson lab<sup>2</sup>. All animal studies were conducted according to ethics guidelines provided by the Institutional Animal Care and Use Committee at University of Alabama at Birmingham. To induce MerCreMer (MCM) activity, tamoxifen (T5648, Sigma, Rockville, MD, USA) dissolved in peanut oil was administered intraperitoneally (IP, 20mg/kg per day x 5 days). Tissue- and induction-specific recombination was confirmed in  $\alpha$ MHC-MCM lines by genomic DNA isolation (D4068, Zymo gDNA kit, Irvine, CA, USA) and PCR reaction around the target exon detailed in Dr. Masaki Komatsu's paper.

Primers that were used:

First Pair: HIND-FW: GGCTGCTACTTCTGCAATGATGT;

PST-RV: CAGGACAGAGACCATCAGCTCCAC; (WT 1500bp, Floxed 500bp).

Thermocycler conditions: cycle 1 (1X), 95.0°C for 10 min; cycle 2 (35X), step 1 at 95.0°C for 30 sec, step 2 at 62.0°C for 30 sec; cycle 3 (1X), 72.0°C for 10 min; then 4 °C.

WT allele will produce a band at 1500bp and floxed allele will produce a 500bp band.

Second Pair: ATG7EX14F: TCTCCCAAGACAAGACAGGGTGAA;

ATG7EX14R: AAGCCAAAGGAAACCAAGGGAGTG. (WT 300bp, Floxed non band)

Thermocycler conditions: cycle 1 (1X), 95.0°C for 10 min; cycle 2 (35X), step 1 at 95.0°C for 30 sec, step 2 at 60.0°C for 30 sec; cycle 3 (1X), 72.0°C for 10 min; then 4 °C.

WT allele will produce a band at 300bp and floxed allele will not produce a band.

Mouse model of time and myocardium-specific ATG7 knockout mice (ATG7F/F;  $\alpha$ MHC-merCremer+) with tamoxifen injection, ATG7 cKO (KO)) were generated, and the loss of ATG7 was verified in isolated adult mouse ventricular myocytes (AMVMs). WT animals used in the  $\alpha$ MHC-merCremer study were the cohort of ATG7F/F;  $\alpha$ MHC-merCremer-, all of which were treated with the same tamoxifen regimen as the experimental group. We have previously shown that there is no difference between the cohorts of ATG7F/F;  $\alpha$ MHC-merCremer- and WT  $\alpha$ MHC-merCremer+ littermates treated with tamoxifen<sup>3</sup>. Animals were maintained in 12hr light/dark cycles with a standard chow diet ad libitum.

### RNA purification and RT-qPCR

Snap-frozen tissues were disrupted in TRIzol (15596026, Fisher, Waltham, MA, USA) by bead beater (FastPrep-24, MP, Irvine, CA, USA) using disposable ceramic beads (6913-100, Fisher, Waltham, MA, USA) to extract total RNA. For isolated cells, TRIzol was used to extract total RNA. A total of 2000 ng of purified RNA was used for reverse-transcription reactions (4368814, Applied biosystems, Waltham, MA, USA). Quantitative PCR reactions were run with cDNA libraries in duplicate with SYBR Green master mix (Biorad, 1725125) on a BioRad CFX384 Real Time PCR machine. All of the primer sets were validated for doubling efficiency using cDNA standard curves. Quantification was performed using the  $\Delta\Delta C_t$  method to obtain relative fold change to WT or untreated sample in each sample set, normalized against a housekeeping gene (beta-actin for mouse). ATG7 primers that are used for mouse ATG7 expression are:

M-ATG7 311-330: TGGAGTTCAGTGCTTTTGAC,

M-ATG7 387-370: GGTGTTGTGCAGGGTTCC.

Internal control used is mouse beta-actin. The primers are:

mBAF: TCACCCACACTGTGCCCATCTACGA,

mBAR: CATCGGAACCGCTCGTTGCCAATAG.

Thermocycles: cycle 1 (1X), 95.0°C for 1.5 min; cycle 2 (30X), step 1 at 95.0°C for 20 sec, step 2 at 61.0°C for 30 sec; cycle 3 (1X), 95.0°C for 1 min; cycle 4 (1X), 55.0°C for 1 min, cycle 5 (40X) 55.0°C for 10 sec with an increase of 1.0°C after each repeat for collecting melt curve data.

### **Western blotting**

Snap-frozen tissue was resuspended in ice-cold lysis buffer (20 mM Tris-HCl pH=8.0, 150 mM NaCl, 0.1% TritonX-100, 2 mM EDTA, 1 mM DTT) with protease/phosphatase inhibitor cocktail (A32961, Thermo Scientific, Waltham, MA, USA). Tissues were processed using a Dounce homogenizer on ice. For tissue cultures, 1XSDS buffer was used to collect cells. Membranes were cut into strips to incubate different antibodies due to each antibody has a different exposure time. Primary antibodies used: LC3-II (rabbit anti-LC3 prepared in Hill Laboratory at UT Southwestern Medical Center, Dallas, TX, USA), GAPDH (10R-G109a, Fitzgerald, Acton, MA, USA), ATG7 (#2631, Cell Signaling Technology, Danvers, MA, USA), Fis1 (# PA5-22142, Invitrogen, Thermo Fisher Scientific, Waltham, MA, USA), Drp1 (ab184247, Abcam, Waltham, MA, USA), Mfn1 (sc-166644, Santa Cruz Biotechnology, Dallas, TX, USA), Mfn2 (ab50843, Abcam, Waltham, MA, USA). After incubation with secondary antibodies (NA931V, NA934V, GE healthcare, Chicago, IL, USA), membranes were imaged with an Amersham Imager 600 and quantified using ImageQuant software.

### **NRVM isolation**

NRVMs were isolated using a Neonatal Cardiomyocyte Isolation kit (Neomyt Kit, NC6031, Cellutron, Baltimore, MD, USA) following the manufacturer's protocol from 1 to 2-day old sprague dawley rats. After 16 hours, the cells were changed to 5% FBS containing medium (3:1 DMEM: M199, supplemented with L-Glutamine, penicillin/streptomycin, and BrdU). After 24 hours, it was changed to serum-free medium. The experiments were done 2-3 day after changing to serum-free medium.

### **AMVM isolation**

The AMVM isolation was performed as previously described<sup>4</sup> with slight modifications using a Langendorff perfusion system. Briefly, the heart was cannulated through the aorta and perfused with perfusion buffer (in mM: 113 NaCl, 4.7 KCl, 0.6 KH<sub>2</sub>PO<sub>4</sub>, 0.6 Na<sub>2</sub>HPO<sub>4</sub>, 1.2 MgSO<sub>4</sub>, 12 NaHCO<sub>3</sub>, 10 KHCO<sub>3</sub>, 10 HEPES, 30 taurine, 10 BDM and 5.5 glucose) after isolating from the adult mouse, followed by digestion buffer (perfusion buffer supplemented with 300U/mL collagenase II and 1.5 mg/mL proteinase XIV). Then the heart was minced and filtered through a 100 µm-Cell strainer. The concentration of Ca<sup>2+</sup> was gradually increased to a final concentration of 900 µM with repeated centrifugation and resuspension. Finally, the cells were resuspended and plated in the plating medium (DMEM 4.5 g/L glucose, supplemented with FBS, blebbistatin and penicillin/streptomycin) at 37°C and 5% CO<sub>2</sub> for 1-3 hrs. Then the cells were cultured with DMEM 4.5 g/L glucose supplemented with BSA and blebbistatin. Cell purity was greater than 98% of cardiomyocytes. Detailed step by step protocol is available upon request.

### **Fluorescent microscope image acquisition and quantification**

Dichlorofluorescein (H2DCFDA, MP36103, 10 µM, Invitrogen, Thermo Fisher Scientific, Waltham, MA, USA), tetramethylrhodamine methylester (TMRM, I34361, T668, 0.1 µM, Invitrogen, Thermo Fisher Scientific, Waltham, MA, USA), and MitoSOX Red (M36008, 5 µM, Invitrogen, Thermo Fisher

Scientific, Waltham, MA, USA) were used to measure total cellular ROS levels, mitochondrial membrane potential and mitochondrial ROS levels in 96-wells cultured NRVMs, respectively. After staining, cells were maintained in PBS and exposed with fixed exposure time at the same magnification using a Nikon Eclipse Ti fluorescent microscope. 5 fields of cells were quantified for each batch of images. Quantifications were using ImageJ software (1.53, NIH, Bethesda, MD, USA ).

### **Assays of cell death**

NRVMs cell death was detected by using MTT Assay Kit (V13154, 5 mg/mL, Invitrogen, Thermo Fisher Scientific, Waltham, MA, USA). NRVMs were treated with simulated ischemia/reperfusion (sI/R) of 5 hours ischemia and 3 hours of reperfusion, then changed to phenol red free culture medium (in mM: 130 NaCl, 4 KCl, 1.25 MgSO<sub>4</sub>, 1.2 CaCl<sub>2</sub>, 6.25 NaHCO<sub>3</sub>, 20 HEPES, 20 D glucose) with 10% MTT solution. Incubated at 37°C overnight then added SDS-HCl solution (SDS 0.1 g/ml, 0.01M HCl) the same volume of the culture medium to mix. Incubated at 37°C for 4 hours then pipetted well to mix sample again, read the absorbance at 570 nm.

AMVMs were treated with simulated ischemia/reperfusion (sI/R) of 1 hour ischemia and 4 hours of reperfusion. Used a Nikon Eclipse Ti fluorescent microscope to take images at the same magnification in the bright field before sI/R, after 2 hours reperfusion, and after 4 hours reperfusion. Live cell numbers were counted by using ImageJ software (1.53, NIH, Bethesda, MD, USA).

### **Electron Microscope (EM)**

Hearts tissues were fixed with 2% glutaraldehyde in 0.1 mol/L cacodylate buffer for 2 hours. Postfixation occurred in 2% osmium tetroxide in 0.1 mol/L cacodylate buffer and 1% aqueous uranyl acetate, each for 1 hour. An ascending series of ethanol washes (50%, 70%, 90%, 100%) was performed, followed by transitioning to propylene oxide and then a 1:1 mixture of propylene oxide and EMbed 812 (Electron Microscopy Sciences). The tissue was incubated in EMbed for 1 hour, then placed in a 70°C oven to polymerize. Sections (75–80 nm) were cut by using a Leica ultramicrotome and a Diatome diamond knife, collected on 200-mesh copper grids, and post-stained with 5% uranyl acetate in ethanol (10 minutes) and Reynold lead citrate (5 minutes). A Tecnai Spirit T12 transmission electron microscope, operating at 20 to 120 kV and equipped with a digital camera, was used to image the sections. Mitochondria numbers and size were analyzed by using ImageJ software (1.53, NIH, Bethesda, MD, USA).

### **ATP concentration measurement in AMVMs**

AMVMs' ATP level was detected by using ATP Determination Kit (A22066, Invitrogen, Thermo Fisher Scientific, Waltham, MA, USA). AMVMs were treated with sI/R of 1 hour ischemia and 4 hours of reperfusion. Boiling water was used to inhibit ATPase5. AMVMs suspension was collected and centrifuged at 12000g for 5 mins at 4°C. The supernatant was used for bioluminescence measurement and read at 560 nm. The standard curve of ATP was obtained by serial dilutions of 10 nM ATP solution.

### **Oxygen consumption rate determination**

Analyses of cellular bioenergetics were performed using the Seahorse XFe96 Extracellular Flux Analyzer (Agilent, Santa Clara, CA)<sup>6,7</sup>. After isolation, the NRVMs were plated into an Agilent seahorse XF96 cell culture microplate (Product No.101085-004) at 28,000 cells/well for 4 days. On the day of the experiment the cells were exposed to 2 hours of ischemia as described above, then 2.5 μM TS/TB was added for a 4-hour reperfusion. After IR or normoxia the cells were changed into the XF media (non-buffered DMEM supplemented with 5.5 mM glucose, 1 mM pyruvate, and 4 mM glutamine, pH 7.36) at 37°C. Oxygen

consumption rate (OCR) was measured for basal OCR (OCR before oligomycin minus OCR after antimycin) followed by sequential injections of 1 µg/ml oligomycin, 1 µM FCCP, and 10 µM antimycin A. Mitochondrial parameters were calculated for ATP-linked (OCR before oligomycin minus OCR after oligomycin), proton leak (OCR after oligomycin minus OCR after antimycin), maximal (OCR after FCCP minus OCR after antimycin), reserve capacity (OCR after FCCP minus OCR before oligomycin), and non-mitochondrial (OCR after antimycin).

### **Statistical analysis**

Data are expressed as the mean  $\pm$  SEM. The sample size of each group was provided in individual figure legends and Table 2. All data and results were explicated in blinded fashion. GraphPad Prism software (version 8.0.2, GraphPad Software, San Diego, CA, USA) was used to perform statistical analyses. The normality of data was examined by Shapiro Wilk test before parametric or non-parametric tests. For comparisons, normally distributed data were analyzed by nonpaired 2 tailed Student t-test (two-group analysis) and two-way ANOVA analysis followed by Tukey's post hoc test (multiple group analysis). Paired data were analyzed by one-way ANOVA represents matched analysis followed by Tukey's post hoc multi comparison test (multiple group analysis). No experiment wide/across test multiple test correction was applied and only within test corrections were made. The representative image was selected from one of the repeated experiments that best matched the mean value. Detailed statistical analysis information including normalization procedures, sample sizes, and named statistical tests for all main and supplementary figures is described in Table 2 in the Supplementary Material.



**Table S1 Sequences of forward and reverse primers used for PCR**

| species | Gene             | Primer  | Primer Sequence (5'-3')      |
|---------|------------------|---------|------------------------------|
| Rat     | Long Mito 13593  | Forward | CCCAGCCACCACTATCATTC AAGTAG  |
| Rat     | Long Mito 13364  | Reverse | TAGAGTTTTTTTGAGGAATAATTCGGTG |
| Rat     | Short Mito 13278 | Forward | CCCACCAAAC TATCATCTCTCAAC    |
| Rat     | Short Mito 13364 | Reverse | TAGAGTTTTTTTGAGGAATAATTCGGTG |
| Mouse   | COXII            | Forward | CCATCCCAGGCCGACTAA           |
| Mouse   | COXII            | Reverse | CAGAGCATTGGCCATAGAATAACC     |
| Mouse   | ATP synthase 6   | Forward | CAAACAAATAATGCTAATCCACACACC  |
| Mouse   | ATP synthase 6   | Reverse | GCTGTAAGCCGGACTGCTAATG       |
| Mouse   | Beta-actin       | Forward | TCACCCACACTGTGCCCATCTACGA    |
| Mouse   | Beta-actin       | Reverse | CATCGGAACCGCTCGTTGCCAATAG    |
| Rat     | COXII            | Forward | CAATCCCCGCGCCGCTAA           |
| Rat     | COXII            | Reverse | CAGAGCATTGGCCATAGAATAGAC     |
| Rat     | ATP synthase 6   | Forward | CAAACAAATAATGTTAATCCACACACC  |
| Rat     | ATP synthase 6   | Reverse | GCTGTTAGTCGTA CTGCTAGTG      |
| Rat     | Beta-actin       | Forward | TCACCCACACTGTGCCCATCTATGA    |
| Rat     | Beta-actin       | Reverse | CATCGGAACCGCTCATTGCCGATAG    |
| Mouse   | PGC-1 $\alpha$   | Forward | AGCCGTGACCACTGACAACGAG       |
| Mouse   | PGC-1 $\alpha$   | Reverse | GCTGCATGGTTCTGAGTGCTAAG      |
| Mouse   | Drp1             | Forward | GGAACCAACAACAGGCAACT         |
| Mouse   | Drp1             | Reverse | GCAACTGGA ACTGGCACAT         |
| Mouse   | Fis1             | Forward | AAGTATGTGCGAGGGCTGTT         |
| Mouse   | Fis1             | Reverse | AGCCAGTCCAATGAGTCCAG         |
| Mouse   | OPA1             | Forward | ATCCTAACGCCATCATCCTG         |

|       |       |         |                       |
|-------|-------|---------|-----------------------|
| Mouse | Opa1  | Reverse | GTTGTATCCTGCTTGGACTGG |
| Mouse | Mfn1  | Forward | TCAGAGCCCATCTTTCAGGT  |
| Mouse | Mfn1  | Reverse | GTTTCCAGCCCACTGTTTTTC |
| Mouse | Mfn2  | Forward | CTCCATCAGGACGAGCAGTT  |
| Mouse | Mfn2  | Reverse | GCACAAACACATCAGCATCC  |
| Mouse | ATG7  | Forward | TGGAGTTCAGTGCTTTTGAC  |
| Mouse | ATG7  | Reverse | GGTGTTGTGCAGGGTTCC    |
| Mouse | PARIS | Forward | AGTTGGACTCTGGAGCAGGA  |
| Mouse | PARIS | Reverse | GCTGCTGTGTTGAGCTTCAG  |
| Mouse | Nrf2  | Forward | CTGAACTCCTGGACGGGACTA |
| Mouse | Nrf2  | Reverse | CGGTGGGTCTCCGTAAATGG  |

**Table S2 Detailed statistical analysis information for all main and supplementary figures**

| Figure | Groups<br>(Sample size)  | Statistical analysis                                                        | Normalization                                  | P value |
|--------|--------------------------|-----------------------------------------------------------------------------|------------------------------------------------|---------|
| 1B     | Normoxia TS (n=3)        | 2-way-ANOVA<br>analysis followed<br>by Tukey's post-hoc<br>multi-comparison | Normalized to the<br>average of Normoxia<br>TS |         |
|        | Normoxia TB (n=3)        |                                                                             |                                                |         |
|        | I2R4 TS (n=3)            |                                                                             |                                                |         |
|        | I2R4 TB (n=3)            |                                                                             |                                                |         |
|        | Normoxia TS BFA<br>(n=3) |                                                                             |                                                |         |
|        | Normoxia TB BFA<br>(n=3) |                                                                             |                                                |         |
|        | I2R4 TS BFA (n=3)        |                                                                             |                                                |         |

|    |                   |                                                                             |                                                   |                                   |
|----|-------------------|-----------------------------------------------------------------------------|---------------------------------------------------|-----------------------------------|
|    | I2R4 TB BFA (n=3) |                                                                             |                                                   | P=0.0085 <i>vs</i><br>I2R4 TS BFA |
| 1D | Normoxia TS (n=4) | 2-way-ANOVA<br>analysis followed<br>by Tukey's post-hoc<br>multi-comparison | Normalized to the<br>individual of Normoxia<br>TS |                                   |
|    | Normoxia TB (n=4) |                                                                             |                                                   |                                   |
|    | I2R4 TS (n=4)     |                                                                             |                                                   | P=0.0066 <i>vs</i><br>Normoxia TS |
|    | I2R4 TB (n=4)     |                                                                             |                                                   | P=0.0223 <i>vs</i><br>I2R4 TS     |
| 1F | Normoxia TS (n=4) | 2-way-ANOVA<br>analysis followed<br>by Tukey's post-hoc<br>multi-comparison | Normalized to the<br>individual of Normoxia<br>TS |                                   |
|    | Normoxia TB (n=4) |                                                                             |                                                   |                                   |
|    | I2R4 TS (n=4)     |                                                                             |                                                   | P=0.0025 <i>vs</i><br>Normoxia TS |
|    | I2R4 TB (n=4)     |                                                                             |                                                   | P=0.0201 <i>vs</i><br>I2R4 TS     |
| 2B | Normoxia TS (n=3) | 2-way-ANOVA<br>analysis followed<br>by Tukey's post-hoc<br>multi-comparison | Normalized to the<br>individual of Normoxia<br>TS |                                   |
|    | Normoxia TB (n=3) |                                                                             |                                                   |                                   |
|    | I2R6 TS (n=3)     |                                                                             |                                                   | P=0.024 <i>vs</i><br>Normoxia TS  |
|    | I2R6 TB (n=3)     |                                                                             |                                                   | P=0.0022 <i>vs</i><br>I2R6 TS     |
| 2C | Normoxia TS (n=3) | 2-way-ANOVA<br>analysis followed<br>by Tukey's post-hoc<br>multi-comparison | Normalized to the<br>individual of Normoxia<br>TS |                                   |
|    | Normoxia TB (n=3) |                                                                             |                                                   |                                   |
|    | I2R6 TS (n=3)     |                                                                             |                                                   | NS <i>vs</i> Normoxia<br>TS       |
|    | I2R6 TB (n=3)     |                                                                             |                                                   | P=0.0117 <i>vs</i><br>I2R6 TS     |
| 2D | Normoxia TS (n=3) | 2-way-ANOVA<br>analysis followed<br>by Tukey's post-hoc<br>multi-comparison | Normalized to the<br>individual of Normoxia<br>TS |                                   |
|    | Normoxia TB (n=3) |                                                                             |                                                   |                                   |
|    | I2R6 TS (n=3)     |                                                                             |                                                   | NS <i>vs</i> Normoxia<br>TS       |

|    |                   |                                                                                                   |                                                   |                                    |
|----|-------------------|---------------------------------------------------------------------------------------------------|---------------------------------------------------|------------------------------------|
|    | I2R6 TB (n=3)     |                                                                                                   |                                                   | P=0.0009 <i>vs</i><br>I2R6 TS      |
| 2F | Normoxia TS (n=4) | 2-way-ANOVA<br>analysis followed<br>by Tukey's post-hoc<br>multi-comparison                       | Normalized to the<br>individual of Normoxia<br>TS |                                    |
|    | Normoxia TB (n=4) |                                                                                                   |                                                   |                                    |
|    | I2R4 TS (n=4)     |                                                                                                   |                                                   | P=0.0001 <i>vs</i><br>Normoxia TS  |
|    | I2R4 TB (n=4)     |                                                                                                   |                                                   | P=0.001 <i>vs</i><br>I2R4 TS       |
| 2H | Normoxia TS (n=5) | 1-way-ANOVA<br>analysis represents<br>matched followed<br>by Tukey's post-hoc<br>multi-comparison | Normalized to the<br>individual of Normoxia<br>TS |                                    |
|    | Normoxia TB (n=5) |                                                                                                   |                                                   |                                    |
|    | I2R4 TS (n=5)     |                                                                                                   |                                                   |                                    |
|    | I2R4 TB (n=5)     |                                                                                                   |                                                   | NS <i>vs</i> Other<br>three groups |
| 2I | Normoxia TS (n=5) | 1-way-ANOVA<br>analysis represents<br>matched followed<br>by Tukey's post-hoc<br>multi-comparison | Normalized to the<br>individual of Normoxia<br>TS |                                    |
|    | Normoxia TB (n=5) |                                                                                                   |                                                   |                                    |
|    | I2R4 TS (n=5)     |                                                                                                   |                                                   |                                    |
|    | I2R4 TB (n=5)     |                                                                                                   |                                                   | NS <i>vs</i> Other<br>three groups |
| 2J | Normoxia TS (n=5) | 1-way-ANOVA<br>analysis represents<br>matched followed<br>by Tukey's post-hoc<br>multi-comparison | Normalized to the<br>individual of Normoxia<br>TS |                                    |
|    | Normoxia TB (n=5) |                                                                                                   |                                                   |                                    |
|    | I2R4 TS (n=5)     |                                                                                                   |                                                   |                                    |
|    | I2R4 TB (n=5)     |                                                                                                   |                                                   | NS <i>vs</i> Other<br>three groups |
| 2K | Normoxia TS (n=5) | 1-way-ANOVA<br>analysis represents<br>matched followed<br>by Tukey's post-hoc<br>multi-comparison | Normalized to the<br>individual of Normoxia<br>TS |                                    |
|    | Normoxia TB (n=5) |                                                                                                   |                                                   |                                    |
|    | I2R4 TS (n=5)     |                                                                                                   |                                                   | P=0.0448 <i>vs</i><br>Normoxia TS  |
|    | I2R4 TB (n=5)     |                                                                                                   |                                                   | P=0.0009 <i>vs</i><br>I2R4 TS      |
| 2L | Normoxia TS (n=5) |                                                                                                   |                                                   |                                    |

|    |                   |                                                                                       |                                             |                         |
|----|-------------------|---------------------------------------------------------------------------------------|---------------------------------------------|-------------------------|
|    | Normoxia TB (n=5) | 1-way-ANOVA analysis represents matched followed by Tukey's post-hoc multi-comparison | Normalized to the individual of Normoxia TS |                         |
|    | I2R4 TS (n=5)     |                                                                                       |                                             | P=0.0217 vs Normoxia TS |
|    | I2R4 TB (n=5)     |                                                                                       |                                             | P=0.0097 vs I2R4 TS     |
| 3B | TS I (n=5)        | 2-way-ANOVA analysis followed by Tukey's post-hoc multi-comparison                    | Normalized to the average of TS R           |                         |
|    | TS B (n=5)        |                                                                                       |                                             |                         |
|    | TS R (n=5)        |                                                                                       |                                             |                         |
|    | TB I (n=5)        |                                                                                       |                                             |                         |
|    | TB B (n=5)        |                                                                                       |                                             | P=0.0054 vs TS B        |
|    | TB R (n=5)        |                                                                                       |                                             |                         |
| 3C | TS I (n=6)        | 2-way-ANOVA analysis followed by Tukey's post-hoc multi-comparison                    | Normalized to the average of TS R           |                         |
|    | TS B (n=6)        |                                                                                       |                                             |                         |
|    | TS R (n=6)        |                                                                                       |                                             |                         |
|    | TB I (n=6)        |                                                                                       |                                             |                         |
|    | TB B (n=6)        |                                                                                       |                                             | P=0.0363 vs TS B        |
|    | TB R (n=6)        |                                                                                       |                                             |                         |
| 3D | TS I (n=6)        | 2-way-ANOVA analysis followed by Tukey's post-hoc multi-comparison                    | Normalized to the average of TS R           |                         |
|    | TS B (n=6)        |                                                                                       |                                             |                         |
|    | TS R (n=6)        |                                                                                       |                                             |                         |
|    | TB I (n=6)        |                                                                                       |                                             |                         |
|    | TB B (n=6)        |                                                                                       |                                             | P=0.0394 vs TS B        |
|    | TB R (n=6)        |                                                                                       |                                             |                         |
| 3E | TS I (n=5)        | 2-way-ANOVA analysis followed                                                         | Normalized to the average of TS R           |                         |
|    | TS B (n=5)        |                                                                                       |                                             |                         |

|    |            |                                                                    |                                   |                  |
|----|------------|--------------------------------------------------------------------|-----------------------------------|------------------|
|    | TS R (n=5) | by Tukey's post-hoc multi-comparison                               |                                   |                  |
|    | TB I (n=5) |                                                                    |                                   |                  |
|    | TB B (n=5) |                                                                    |                                   | P=0.0311 vs TS B |
|    | TB R (n=5) |                                                                    |                                   |                  |
| 3F | TS I (n=7) | 2-way-ANOVA analysis followed by Tukey's post-hoc multi-comparison | Normalized to the average of TS R |                  |
|    | TS B (n=7) |                                                                    |                                   |                  |
|    | TS R (n=7) |                                                                    |                                   |                  |
|    | TB I (n=6) |                                                                    |                                   |                  |
|    | TB B (n=6) |                                                                    |                                   | P=0.0292 vs TS B |
|    | TB R (n=6) |                                                                    |                                   |                  |
| 3G | TS I (n=7) | 2-way-ANOVA analysis followed by Tukey's post-hoc multi-comparison | Normalized to the average of TS R |                  |
|    | TS B (n=7) |                                                                    |                                   |                  |
|    | TS R (n=7) |                                                                    |                                   |                  |
|    | TB I (n=6) |                                                                    |                                   |                  |
|    | TB B (n=6) |                                                                    |                                   | P=0.3763 vs TS B |
|    | TB R (n=6) |                                                                    |                                   |                  |
| 3H | TS I (n=7) | 2-way-ANOVA analysis followed by Tukey's post-hoc multi-comparison | Normalized to the average of TS R |                  |
|    | TS B (n=7) |                                                                    |                                   |                  |
|    | TS R (n=7) |                                                                    |                                   |                  |
|    | TB I (n=6) |                                                                    |                                   |                  |
|    | TB B (n=6) |                                                                    |                                   | P=0.0091 vs TS B |
|    | TB R (n=6) |                                                                    |                                   |                  |
| 3I | TS I (n=7) | 2-way-ANOVA analysis followed                                      | Normalized to the average of TS R |                  |
|    | TS B (n=7) |                                                                    |                                   |                  |

|          |             |                                                                    |                                    |                          |
|----------|-------------|--------------------------------------------------------------------|------------------------------------|--------------------------|
|          | TS R (n=7)  | by Tukey's post-hoc multi-comparison                               |                                    |                          |
|          | TB I (n=6)  |                                                                    |                                    |                          |
|          | TB B (n=6)  |                                                                    |                                    | P=0.0444 <i>vs</i> TS B  |
|          | TB R (n=6)  |                                                                    |                                    |                          |
| 3J       | TS I (n=7)  | 2-way-ANOVA analysis followed by Tukey's post-hoc multi-comparison | Normalized to the average of TS R  |                          |
|          | TS B (n=7)  |                                                                    |                                    |                          |
|          | TS R (n=7)  |                                                                    |                                    |                          |
|          | TB I (n=6)  |                                                                    |                                    |                          |
|          | TB B (n=6)  |                                                                    |                                    | P=0.0323 <i>vs</i> TS B  |
|          | TB R (n=6)  |                                                                    |                                    |                          |
| 3L Left  | TS (n=4)    | Nonpaired 2-tailed Student t test                                  | Normalized to the average of TS    |                          |
|          | TB (n=4)    |                                                                    |                                    | NS <i>vs</i> TS          |
| 3L Right | TS (n=4)    | Nonpaired 2-tailed Student t test                                  | Normalized to the average of TS    |                          |
|          | TB (n=4)    |                                                                    |                                    | P=0.0282 <i>vs</i> TS    |
| 4B Left  | WT (n=3)    | Nonpaired 2-tailed Student t test                                  | Normalized to the average of WT    |                          |
|          | KO (n=3)    |                                                                    |                                    | P=0.0151 <i>vs</i> WT    |
| 4B Right | WT (n=3)    | Nonpaired 2-tailed Student t test                                  | Normalized to the average of WT    |                          |
|          | KO (n=3)    |                                                                    |                                    | P=0.002 <i>vs</i> WT     |
| 4C       | WT (n=6)    | Nonpaired 2-tailed Student t test                                  | Normalized to the average of WT    |                          |
|          | KO (n=5)    |                                                                    |                                    | P=0.0073 <i>vs</i> WT    |
| 4D       | WT TS (n=6) | 2-way-ANOVA analysis followed by Tukey's post-hoc multi-comparison | Normalized to the average of WT TS |                          |
|          | WT TB (n=6) |                                                                    |                                    | P=0.0212 <i>vs</i> WT TS |
|          | KO TS (n=5) |                                                                    |                                    | NS <i>vs</i> WT TS       |

|    |             |                                                                    |                                    |                          |
|----|-------------|--------------------------------------------------------------------|------------------------------------|--------------------------|
|    | KO TB (n=5) |                                                                    |                                    | NS <i>vs</i> KO TS       |
| 4E | WT TS (n=6) | 2-way-ANOVA analysis followed by Tukey's post-hoc multi-comparison | Normalized to the average of WT TS |                          |
|    | WT TB (n=6) |                                                                    |                                    | P=0.048 <i>vs</i> WT TS  |
|    | KO TS (n=5) |                                                                    |                                    | NS <i>vs</i> WT TS       |
|    | KO TB (n=5) |                                                                    |                                    | NS <i>vs</i> KO TS       |
| 4F | WT TS (n=6) | 2-way-ANOVA analysis followed by Tukey's post-hoc multi-comparison | Normalized to the average of WT TS |                          |
|    | WT TB (n=6) |                                                                    |                                    | P=0.0365 <i>vs</i> WT TS |
|    | KO TS (n=5) |                                                                    |                                    | NS <i>vs</i> WT TS       |
|    | KO TB (n=5) |                                                                    |                                    | NS <i>vs</i> KO TS       |
| 4G | WT TS (n=6) | 2-way-ANOVA analysis followed by Tukey's post-hoc multi-comparison | Normalized to the average of WT TS |                          |
|    | WT TB (n=6) |                                                                    |                                    | P=0.3713 <i>vs</i> WT TS |
|    | KO TS (n=5) |                                                                    |                                    | NS <i>vs</i> WT TS       |
|    | KO TB (n=5) |                                                                    |                                    | NS <i>vs</i> KO TS       |
| 4H | WT TS (n=6) | 2-way-ANOVA analysis followed by Tukey's post-hoc multi-comparison | Normalized to the average of WT TS |                          |
|    | WT TB (n=6) |                                                                    |                                    | P=0.0104 <i>vs</i> WT TS |
|    | KO TS (n=5) |                                                                    |                                    | NS <i>vs</i> WT TS       |
|    | KO TB (n=5) |                                                                    |                                    | NS <i>vs</i> KO TS       |
| 4I | WT TS (n=6) | 2-way-ANOVA analysis followed by Tukey's post-hoc multi-comparison | Normalized to the average of WT TS |                          |
|    | WT TB (n=6) |                                                                    |                                    | P=0.0243 <i>vs</i> WT TS |
|    | KO TS (n=5) |                                                                    |                                    | NS <i>vs</i> WT TS       |
|    | KO TB (n=5) |                                                                    |                                    | NS <i>vs</i> KO TS       |
| 4J | WT TS (n=6) | 2-way-ANOVA analysis followed by Tukey's post-hoc multi-comparison | Normalized to the average of WT TS |                          |
|    | WT TB (n=6) |                                                                    |                                    | P=0.0494 <i>vs</i> WT TS |



|    |             |                                                                             |                                       |                             |
|----|-------------|-----------------------------------------------------------------------------|---------------------------------------|-----------------------------|
|    | KO TS (n=5) |                                                                             |                                       | NS <i>vs</i> WT TS          |
|    | KO TB (n=5) |                                                                             |                                       | NS <i>vs</i> KO TS          |
| 5A | WT (n=10)   | Nonpaired 2-tailed<br>Student t test                                        | Normalized to the<br>average of WT    |                             |
|    | KO (n=9)    |                                                                             |                                       | P=0.0002 <i>vs</i><br>WT    |
| 5B | WT TS (n=6) | 2-way-ANOVA<br>analysis followed<br>by Tukey's post-hoc<br>multi-comparison | Normalized to the<br>average of WT TS |                             |
|    | WT TB (n=4) |                                                                             |                                       | P=0.023 <i>vs</i> WT<br>TS  |
|    | KO TS (n=5) |                                                                             |                                       | NS <i>vs</i> WT TS          |
|    | KO TB (n=4) |                                                                             |                                       | NS <i>vs</i> KO TS          |
| 5C | WT TS (n=6) | 2-way-ANOVA<br>analysis followed<br>by Tukey's post-hoc<br>multi-comparison | Normalized to the<br>average of WT TS |                             |
|    | WT TB (n=4) |                                                                             |                                       | P=0.0421 <i>vs</i><br>WT TS |
|    | KO TS (n=5) |                                                                             |                                       | NS <i>vs</i> WT TS          |
|    | KO TB (n=4) |                                                                             |                                       | NS <i>vs</i> KO TS          |
| 5D | WT TS (n=6) | 2-way-ANOVA<br>analysis followed<br>by Tukey's post-hoc<br>multi-comparison | Normalized to the<br>average of WT TS |                             |
|    | WT TB (n=4) |                                                                             |                                       | P=0.0216 <i>vs</i><br>WT TS |
|    | KO TS (n=5) |                                                                             |                                       | NS <i>vs</i> WT TS          |
|    | KO TB (n=4) |                                                                             |                                       | NS <i>vs</i> KO TS          |
| 5E | WT TS (n=6) | 2-way-ANOVA<br>analysis followed<br>by Tukey's post-hoc<br>multi-comparison | Normalized to the<br>average of WT TS |                             |
|    | WT TB (n=4) |                                                                             |                                       | P=0.0205 <i>vs</i><br>WT TS |
|    | KO TS (n=5) |                                                                             |                                       | NS <i>vs</i> WT TS          |
|    | KO TB (n=4) |                                                                             |                                       | NS <i>vs</i> KO TS          |
| 5F | WT TS (n=6) | 2-way-ANOVA<br>analysis followed<br>by Tukey's post-hoc<br>multi-comparison | Normalized to the<br>average of WT TS |                             |
|    | WT TB (n=4) |                                                                             |                                       | P=0.0121 <i>vs</i><br>WT TS |
|    | KO TS (n=5) |                                                                             |                                       | NS <i>vs</i> WT TS          |

|             |                   |                                                                    |                                          |                                |
|-------------|-------------------|--------------------------------------------------------------------|------------------------------------------|--------------------------------|
|             | KO TB (n=4)       |                                                                    |                                          | NS <i>vs</i> KO TS             |
| 5G          | WT TS (n=6)       | 2-way-ANOVA analysis followed by Tukey's post-hoc multi-comparison | Normalized to the average of WT TS       |                                |
|             | WT TB (n=4)       |                                                                    |                                          | P=0.0459 <i>vs</i> WT TS       |
|             | KO TS (n=5)       |                                                                    |                                          | NS <i>vs</i> WT TS             |
|             | KO TB (n=4)       |                                                                    |                                          | NS <i>vs</i> KO TS             |
| 5H          | WT TS (n=6)       | 2-way-ANOVA analysis followed by Tukey's post-hoc multi-comparison | Normalized to the average of WT TS       |                                |
|             | WT TB (n=4)       |                                                                    |                                          | P=0.0095 <i>vs</i> WT TS       |
|             | KO TS (n=5)       |                                                                    |                                          | NS <i>vs</i> WT TS             |
|             | KO TB (n=4)       |                                                                    |                                          | NS <i>vs</i> KO TS             |
| S1B Up      | TS (n=4)          | Nonpaired 2-tailed Student t test                                  | Normalized to the average of TS          |                                |
|             | TB (n=4)          |                                                                    |                                          | NS <i>vs</i> TS                |
| S1B Down    | TS (n=4)          | Nonpaired 2-tailed Student t test                                  | Normalized to the average of TS          |                                |
|             | TB (n=4)          |                                                                    |                                          | P=0.0071 <i>vs</i> TS          |
| S1C         | Normoxia TS (n=6) | 2-way-ANOVA analysis followed by Tukey's post-hoc multi-comparison | Normalized to the average of Normoxia TS |                                |
|             | Normoxia TB (n=6) |                                                                    |                                          | P=0.0048 <i>vs</i> Normoxia TS |
|             | I1R4 TS (n=6)     |                                                                    |                                          | NS <i>vs</i> Normoxia TS       |
|             | I1R4 TB (n=6)     |                                                                    |                                          | P=0.0278 <i>vs</i> I1R4 TS     |
| S1D         | Normoxia TS (n=4) | 2-way-ANOVA analysis followed by Tukey's post-hoc multi-comparison | Normalized to the average of Normoxia TS |                                |
|             | Normoxia TB (n=4) |                                                                    |                                          |                                |
|             | I2R4 TS (n=4)     |                                                                    |                                          | P<0.0001 <i>vs</i> Normoxia TS |
|             | I2R4 TB (n=4)     |                                                                    |                                          | P=0.0282 <i>vs</i> I2R4 TS     |
| S2A Up Left | TS (n=4)          |                                                                    |                                          |                                |

|                |             |                                                                             |                                       |                                    |
|----------------|-------------|-----------------------------------------------------------------------------|---------------------------------------|------------------------------------|
|                | TB (n=4)    | Nonpaired 2-tailed<br>Student t test                                        | Normalized to the<br>average of TS    | NS <i>vs</i> TS                    |
| S2A Up Right   | TS (n=4)    | Nonpaired 2-tailed<br>Student t test                                        | Normalized to the<br>average of TS    |                                    |
|                | TB (n=4)    |                                                                             |                                       | NS <i>vs</i> TS                    |
| S2A Down Left  | TS (n=4)    | Nonpaired 2-tailed<br>Student t test                                        | Normalized to the<br>average of TS    |                                    |
|                | TB (n=4)    |                                                                             |                                       | NS <i>vs</i> TS                    |
| S2A Down Right | TS (n=4)    | Nonpaired 2-tailed<br>Student t test                                        | Normalized to the<br>average of TS    |                                    |
|                | TB (n=4)    |                                                                             |                                       | NS <i>vs</i> TS                    |
| S3A            | WT TS (n=6) | 2-way-ANOVA<br>analysis followed<br>by Tukey's post-hoc<br>multi-comparison | Normalized to the<br>average of WT TS |                                    |
|                | WT TB (n=6) |                                                                             |                                       | P=0.0212 <i>vs</i><br>WT TS        |
|                | KO TS (n=5) |                                                                             |                                       | NS <i>vs</i> WT TS                 |
|                | KO TB (n=5) |                                                                             |                                       | NS <i>vs</i> KO TS                 |
| S3B Left       | WT TS (n=6) | 2-way-ANOVA<br>analysis followed<br>by Tukey's post-hoc<br>multi-comparison | Normalized to the<br>average of WT TS |                                    |
|                | WT TB (n=6) |                                                                             |                                       | NS <i>vs</i> Other<br>three groups |
|                | KO TS (n=5) |                                                                             |                                       |                                    |
|                | KO TB (n=5) |                                                                             |                                       |                                    |
| S3B Right      | WT TS (n=6) | 2-way-ANOVA<br>analysis followed<br>by Tukey's post-hoc<br>multi-comparison | Normalized to the<br>average of WT TS |                                    |
|                | WT TB (n=6) |                                                                             |                                       | NS <i>vs</i> Other<br>three groups |
|                | KO TS (n=5) |                                                                             |                                       |                                    |
|                | KO TB (n=5) |                                                                             |                                       |                                    |
| S4B Up Left    | TS (n=6)    | Nonpaired 2-tailed<br>Student t test                                        | Normalized to the<br>average of TS    |                                    |
|                | TB (n=6)    |                                                                             |                                       | NS <i>vs</i> TS                    |
| S4B Up Right   | TS (n=6)    | Nonpaired 2-tailed<br>Student t test                                        | Normalized to the<br>average of TS    |                                    |
|                | TB (n=6)    |                                                                             |                                       | NS <i>vs</i> TS                    |
| S4B Down Left  | TS (n=6)    |                                                                             |                                       |                                    |

|                |          |                                      |                                    |                       |
|----------------|----------|--------------------------------------|------------------------------------|-----------------------|
|                | TB (n=6) | Nonpaired 2-tailed<br>Student t test | Normalized to the<br>average of TS | NS <i>vs</i> TS       |
| S4B Down Right | TS (n=6) | Nonpaired 2-tailed<br>Student t test | Normalized to the<br>average of TS |                       |
|                | TB (n=6) |                                      |                                    | P=0.0095 <i>vs</i> TS |

1. Komatsu M, Waguri S, Ueno T, Iwata J, Murata S, Tanida I, Ezaki J, Mizushima N, Ohsumi Y, Uchiyama Y, Kominami E, Tanaka K and Chiba T. Impairment of starvation-induced and constitutive autophagy in Atg7-deficient mice. *The Journal of cell biology*. 2005;169:425-34.
2. Sohal DS, Nghiem M, Crackower MA, Witt SA, Kimball TR, Tymitz KM, Penninger JM and Molkentin JD. Temporally regulated and tissue-specific gene manipulations in the adult and embryonic heart using a tamoxifen-inducible Cre protein. *Circ Res*. 2001;89:20-5.
3. Xie M, Cho GW, Kong Y, Li DL, Altamirano F, Luo X, Morales CR, Jiang N, Schiattarella GG, May HI, Medina J, Shelton JM, Ferdous A, Gillette TG and Hill JA. Activation of Autophagic Flux Blunts Cardiac Ischemia/Reperfusion Injury. *Circulation research*. 2021;129:435-450.
4. Li D, Wu J, Bai Y, Zhao X and Liu L. Isolation and culture of adult mouse cardiomyocytes for cell signaling and in vitro cardiac hypertrophy. *J Vis Exp*. 2014.
5. Yang NC, Ho WM, Chen YH and Hu ML. A convenient one-step extraction of cellular ATP using boiling water for the luciferin-luciferase assay of ATP. *Anal Biochem*. 2002;306:323-7.
6. Dranka BP, Benavides GA, Diers AR, Giordano S, Zelickson BR, Reily C, Zou L, Chatham JC, Hill BG, Zhang J, Landar A and Darley-Usmar VM. Assessing bioenergetic function in response to oxidative stress by metabolic profiling. *Free Radic Biol Med*. 2011;51:1621-35.
7. Redmann M, Benavides GA, Wani WY, Berryhill TF, Ouyang X, Johnson MS, Ravi S, Mitra K, Barnes S, Darley-Usmar VM and Zhang J. Methods for assessing mitochondrial quality control mechanisms and cellular consequences in cell culture. *Redox Biol*. 2018;17:59-69.
